# Supplementary material
Source: publisher site journal article supplement (https://www.dovepress.com/get_supplementary_file.php?f=182525-3.xlsx)
Supplement: Supplementary file 1 [file get_supplementary_file.php]

## Sheet: Sheet1
id	term	ListHits	ListTotal	PopHits	PopTotal	pval	padj	Enrichment_score	Gene
path:hsa00970	Aminoacyl-tRNA biosynthesis	11	85	210	34299	1.8e-13	1.02e-11	21.1366	NM_004184.3;NM_173701.1;NM_213645.1;NM_213646.1;XM_005268044.2;XM_006720249.2;XM_011537133.1;XM_011537134.1;XM_011537135.1;XM_011537136.1;XM_011537137.1
path:hsa04071	Sphingolipid signaling pathway	15	85	668	34299	8.13e-12	1.54e-10	9.06103	NM_001144772.1;NM_001291428.1;NM_001291431.1;NM_138761.3;NM_138763.3;NM_138764.4;XM_006723314.2;XM_011527191.1;XM_011541773.1;XM_011541774.1;XM_011541776.1;XM_011541777.1;XM_011541778.1;XM_011541779.1;XM_011541780.1
path:hsa04080	Neuroactive ligand-receptor interaction	19	85	1398	34299	1.57e-10	2.24e-09	5.48415	NM_000830.3;NM_001126044.1;NM_001164692.2;NM_019839.4;NM_175611.2;NM_198714.1;NM_198715.2;NM_198716.1;NM_198717.1;NM_198718.1;NM_198719.1;XM_005260942.1;XM_005260943.1;XM_005260944.2;XM_005267891.2;XM_006723991.1;XM_011541809.1;XM_011541810.1;XM_011541811.1
path:hsa00531	Glycosaminoglycan degradation	7	85	103	34299	1.99e-10	2.27e-09	27.4235	NM_000203.4;XM_006713882.2;XM_011513459.1;XM_011513460.1;XM_011513461.1;XM_011513462.1;XM_011513463.1
path:hsa04923	Regulation of lipolysis in adipocyte	10	85	315	34299	3.84e-10	3.65e-09	12.8101	NM_001126044.1;NM_198714.1;NM_198715.2;NM_198716.1;NM_198717.1;NM_198718.1;NM_198719.1;XM_011541809.1;XM_011541810.1;XM_011541811.1
path:hsa04370	VEGF signaling pathway	9	85	361	34299	2.29e-08	1.63e-07	10.06	NM_001161441.1;NM_001161442.1;NM_001161443.1;NM_001161444.1;NM_003975.3;XM_006711615.1;XM_011510113.1;XM_011510114.1;XM_011510115.1
path:hsa04215	Apoptosis - multiple species	7	85	261	34299	2.93e-07	1.86e-06	10.8223	NM_001291428.1;NM_001291431.1;NM_138761.3;NM_138763.3;NM_138764.4;XM_006723314.2;XM_011527191.1
path:hsa05014	Amyotrophic lateral sclerosis (ALS)	7	85	265	34299	3.29e-07	1.87e-06	10.659	NM_001291428.1;NM_001291431.1;NM_138761.3;NM_138763.3;NM_138764.4;XM_006723314.2;XM_011527191.1
path:hsa04020	Calcium signaling pathway	12	85	1052	34299	1.89e-06	9.8e-06	4.60286	NM_001126044.1;NM_001164692.2;NM_019839.4;NM_198714.1;NM_198715.2;NM_198716.1;NM_198717.1;NM_198718.1;NM_198719.1;XM_011541809.1;XM_011541810.1;XM_011541811.1
path:hsa05200	Pathways in cancer	18	85	2314	34299	3.01e-06	1.39e-05	3.13886	NM_001083607.1;NM_001126044.1;NM_001291428.1;NM_001291431.1;NM_138761.3;NM_138763.3;NM_138764.4;NM_198714.1;NM_198715.2;NM_198716.1;NM_198717.1;NM_198718.1;NM_198719.1;XM_006723314.2;XM_011527191.1;XM_011541809.1;XM_011541810.1;XM_011541811.1
path:hsa05210	Colorectal cancer	7	85	418	34299	9.66e-06	3.93e-05	6.75747	NM_001291428.1;NM_001291431.1;NM_138761.3;NM_138763.3;NM_138764.4;XM_006723314.2;XM_011527191.1
path:hsa04115	p53 signaling pathway	7	85	428	34299	1.15e-05	4.35e-05	6.59959	NM_001291428.1;NM_001291431.1;NM_138761.3;NM_138763.3;NM_138764.4;XM_006723314.2;XM_011527191.1
path:hsa04142	Lysosome	8	85	571	34299	1.24e-05	4.4e-05	5.65349	NM_000203.4;NM_020533.2;XM_006713882.2;XM_011513459.1;XM_011513460.1;XM_011513461.1;XM_011513462.1;XM_011513463.1
path:hsa04024	cAMP signaling pathway	11	85	1216	34299	4.52e-05	0.000143063	3.65024	NM_001083607.1;NM_001126044.1;NM_198714.1;NM_198715.2;NM_198716.1;NM_198717.1;NM_198718.1;NM_198719.1;XM_011541809.1;XM_011541810.1;XM_011541811.1
path:hsa04530	Tight junction	9	85	856	34299	5.14e-05	0.000154253	4.24259	NM_001130861.1;NM_003277.3;XM_011541773.1;XM_011541774.1;XM_011541776.1;XM_011541777.1;XM_011541778.1;XM_011541779.1;XM_011541780.1
path:hsa04062	Chemokine signaling pathway	9	85	896	34299	7.51e-05	0.000214058	4.05319	NM_000377.2;XM_011541773.1;XM_011541774.1;XM_011541776.1;XM_011541777.1;XM_011541778.1;XM_011541779.1;XM_011541780.1;XM_011543977.1
path:hsa04211	Longevity regulating pathway - mammal	7	85	622	34299	0.000157962	0.000409264	4.5412	NM_001291428.1;NM_001291431.1;NM_138761.3;NM_138763.3;NM_138764.4;XM_006723314.2;XM_011527191.1
path:hsa04611	Platelet activation	7	85	645	34299	0.00020206	0.000500757	4.37926	XM_011541773.1;XM_011541774.1;XM_011541776.1;XM_011541777.1;XM_011541778.1;XM_011541779.1;XM_011541780.1
path:hsa04144	Endocytosis	11	85	1488	34299	0.000298519	0.000680623	2.98299	NM_000377.2;XM_005253166.1;XM_006718346.1;XM_011541773.1;XM_011541774.1;XM_011541776.1;XM_011541777.1;XM_011541778.1;XM_011541779.1;XM_011541780.1;XM_011543977.1
path:hsa04931	Insulin resistance	7	85	713	34299	0.000395028	0.000866023	3.9616	XM_011541773.1;XM_011541774.1;XM_011541776.1;XM_011541777.1;XM_011541778.1;XM_011541779.1;XM_011541780.1
path:hsa04910	Insulin signaling pathway	8	85	914	34299	0.000439304	0.000927419	3.53188	NM_001164760.1;XM_011541773.1;XM_011541774.1;XM_011541776.1;XM_011541777.1;XM_011541778.1;XM_011541779.1;XM_011541780.1
path:hsa04722	Neurotrophin signaling pathway	7	85	788	34299	0.000760019	0.00149206	3.58455	NM_001291428.1;NM_001291431.1;NM_138761.3;NM_138763.3;NM_138764.4;XM_006723314.2;XM_011527191.1
path:hsa04210	Apoptosis	7	85	792	34299	0.000785295	0.00149206	3.56644	NM_001291428.1;NM_001291431.1;NM_138761.3;NM_138763.3;NM_138764.4;XM_006723314.2;XM_011527191.1
path:hsa04390	Hippo signaling pathway	7	85	871	34299	0.00144023	0.00248767	3.24297	XM_011541773.1;XM_011541774.1;XM_011541776.1;XM_011541777.1;XM_011541778.1;XM_011541779.1;XM_011541780.1
path:hsa05203	Viral carcinogenesis	7	85	1088	34299	0.00558048	0.0093555	2.59616	NM_001291428.1;NM_001291431.1;NM_138761.3;NM_138763.3;NM_138764.4;XM_006723314.2;XM_011527191.1
path:hsa00564	Glycerophospholipid metabolism	5	85	672	34299	0.00654655	0.0106615	3.00236	NM_001098537.2;NM_152286.4;XM_006717102.1;XM_006717104.2;XM_011518664.1
path:hsa05340	Primary immunodeficiency	2	85	190	34299	0.0118519	0.0182584	4.24755	NM_020070.3;XM_011530169.1
path:hsa05130	Pathogenic Escherichia coli infection	2	85	199	34299	0.0134129	0.0201193	4.05545	NM_000377.2;XM_011543977.1
path:hsa05166	HTLV-I infection	7	85	1430	34299	0.0253958	0.037117	1.97526	NM_001291428.1;NM_001291431.1;NM_138761.3;NM_138763.3;NM_138764.4;XM_006723314.2;XM_011527191.1
path:hsa00534	Glycosaminoglycan biosynthesis - heparan sulfate / heparin	1	85	112	34299	0.0316442	0.0450929	3.60284	XM_005268435.3
path:hsa05131	Shigellosis	2	85	346	34299	0.054909	0.0763369	2.33247	NM_000377.2;XM_011543977.1
path:hsa05132	Salmonella infection	2	85	379	34299	0.0682233	0.0925888	2.12938	NM_000377.2;XM_011543977.1
path:hsa04621	NOD-like receptor signaling pathway	2	85	410	34299	0.0819389	0.108617	1.96838	NM_052813.4;NM_052814.3
path:hsa05100	Bacterial invasion of epithelial cells	2	85	507	34299	0.131513	0.170369	1.59179	NM_000377.2;XM_011543977.1
path:hsa04340	Hedgehog signaling pathway	1	85	260	34299	0.136091	0.172381	1.55199	NM_001083607.1
path:hsa04670	Leukocyte transendothelial migration	2	85	545	34299	0.153264	0.189914	1.4808	NM_001130861.1;NM_003277.3
path:hsa04666	Fc gamma R-mediated phagocytosis	2	85	572	34299	0.169369	0.205405	1.4109	NM_000377.2;XM_011543977.1
path:hsa05217	Basal cell carcinoma	1	85	304	34299	0.174048	0.206682	1.32736	NM_001083607.1
path:hsa05231	Choline metabolism in cancer	2	85	588	34299	0.179139	0.208386	1.37251	NM_000377.2;XM_011543977.1
path:hsa05160	Hepatitis C	2	85	638	34299	0.210602	0.240086	1.26495	NM_001130861.1;NM_003277.3
path:hsa04520	Adherens junction	2	85	680	34299	0.237915	0.265905	1.18682	NM_000377.2;XM_011543977.1
path:hsa05010	Alzheimer's disease	2	85	715	34299	0.261132	0.286241	1.12872	XM_006718211.1;XM_006718213.1
path:hsa04514	Cell adhesion molecules (CAMs)	2	85	855	34299	0.355886	0.382745	0.943901	NM_001130861.1;NM_003277.3
path:hsa04310	Wnt signaling pathway	1	85	816	34299	0.603603	0.637137	0.494507	XM_011513250.1
path:hsa04810	Regulation of actin cytoskeleton	2	85	1279	34299	0.618718	0.641217	0.630989	NM_000377.2;XM_011543977.1
path:hsa04360	Axon guidance	1	85	1063	34299	0.744404	0.757697	0.379603	NM_001083607.1
path:hsa05205	Proteoglycans in cancer	1	85	1247	34299	0.819705	0.819705	0.323591	NM_001083607.1
